# Supplementary material for: Quantitative assessment of cardiomyocyte mechanobiology through high-throughput cantilever-based functional well plate systems
Source: Royal Society of Chemistry journal article supplement (doi:10.1039/d3an01286g), 2023-01-01
Supplement: d3an01286g1.pdf [file d3an01286g1.pdf]

# Quantitative Assessment of Cardiomyocytes Mechanobiology through High-Throughput Cantilever-Based Functional Well Plate Systems

Jongyun Kim<sup>a,d</sup>, Arunkumar Shanmugasundaram<sup>a,d</sup>, Dong-Su Kim<sup>a,d</sup>, Yun-Jin Jeong<sup>a,d</sup>,  
Pooja. P Kanade<sup>a,d</sup>, Eung-Sam Kim<sup>b,c</sup>, Bong-Kee Lee<sup>a,c</sup> and Dong-Weon Lee<sup>a,c,d\*</sup>

<sup>a</sup> MEMS and Nanotechnology Laboratory,

School of Mechanical Engineering, Chonnam National University,

Gwangju 61186, Republic of Korea.

<sup>b</sup> Department of Biological Sciences,

Chonnam National University, Gwangju, 61186, Republic of Korea

<sup>c</sup> Center for Next-Generation Sensor Research and Development,

Chonnam National University, Gwangju 61186, Republic of Korea.

<sup>d</sup> Advanced Medical Device Research Center for Cardiovascular Disease.

Chonnam National University, Gwangju 61186, Republic of Korea.

\* Corresponding author, Email: [mems@jnu.ac.kr](mailto:mems@jnu.ac.kr).

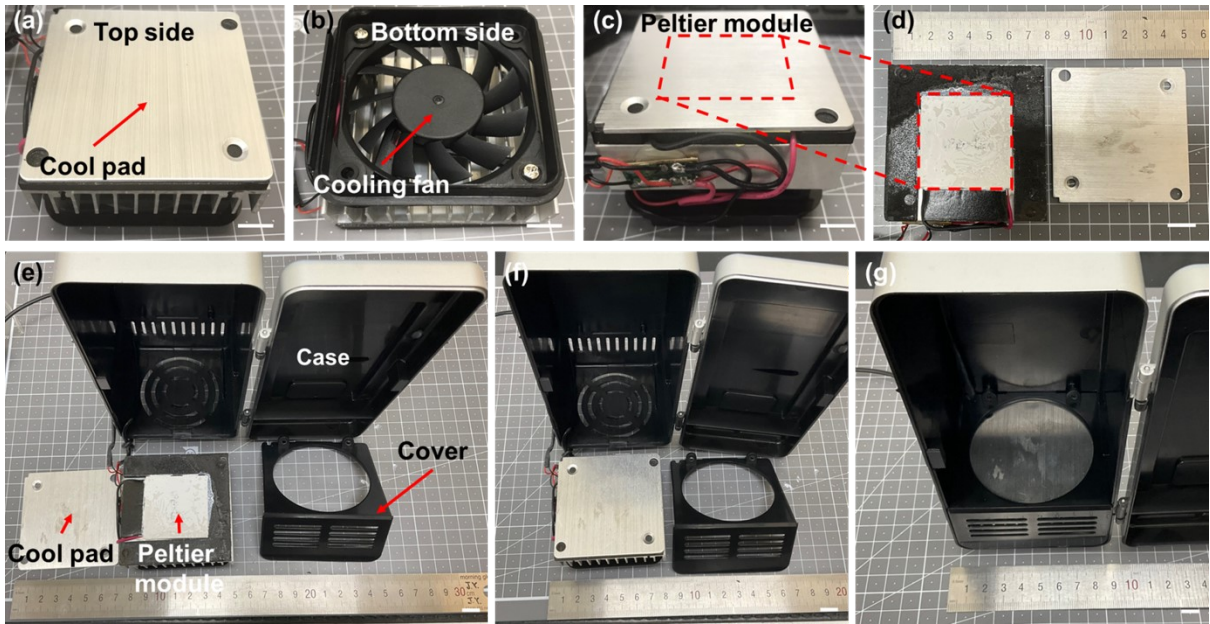

Figure S1. Manufactured USB type Peltier refrigerator; (a) upper cooling pad; (b) lower cooling fan; (c) Peltier module and 5 V USB circuit; (d) Peltier module refrigerator case and culture medium storage (e-g) Peltier refrigerator. (Scale 1 cm in white color)

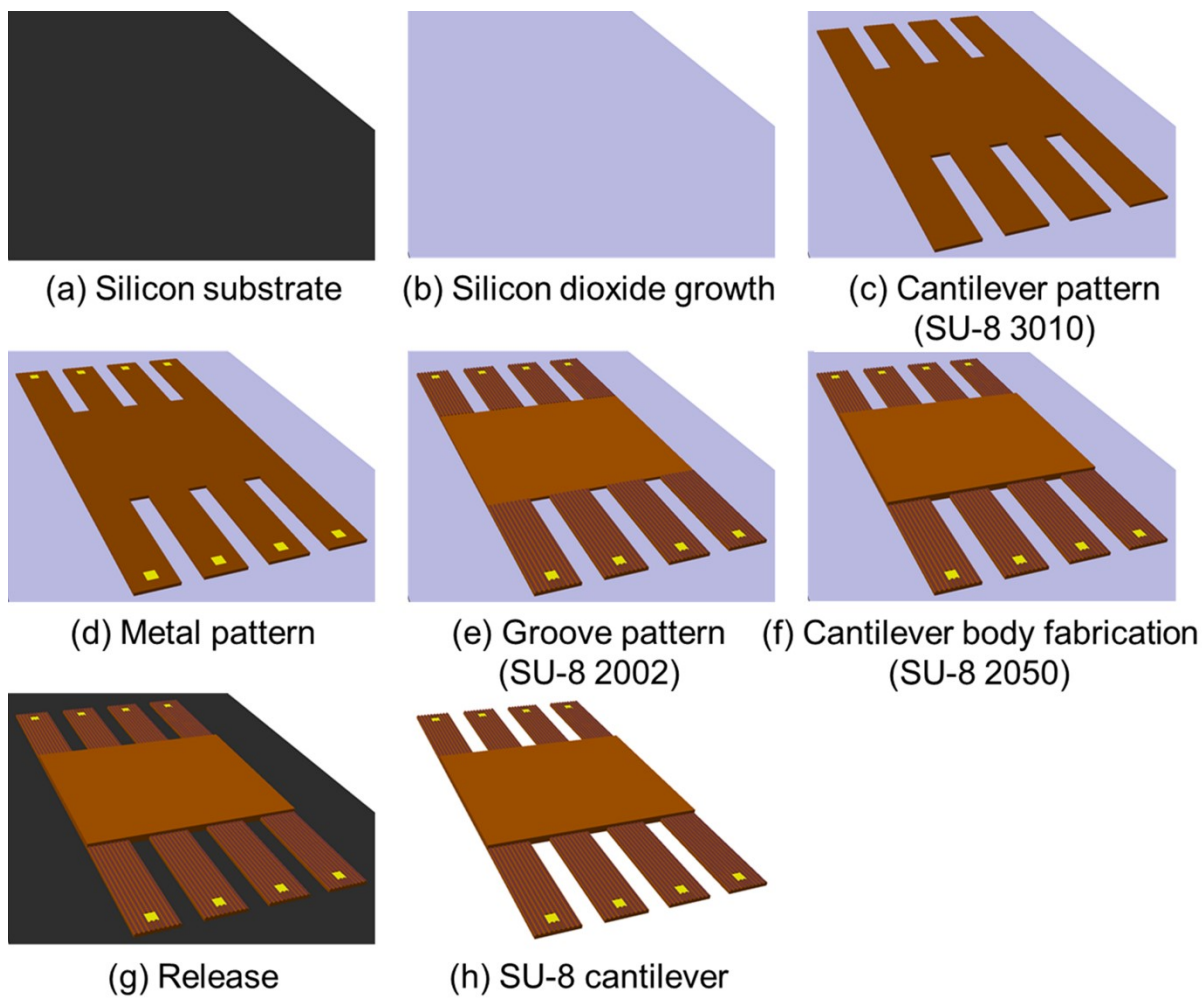

Figure S2. SU-8 cantilever fabrication process, (a) Si wafer, (b) 300 nm thickness  $\text{SiO}_2$  sacrificial layer, (c) SU-8 3010 pattern, (d) metal pattern, (e) SU-8 2002 (groove) pattern, (f) SU-8 2050 cantilever body fabrication, (g) release, (h) SU-8 cantilever array

Table S1. Temperature distribution of manufactured Peltier refrigerators

| Time \ Temperature (°C) | Bottom | Left | Center | Right | Top  |
|-------------------------|--------|------|--------|-------|------|
| 5 min                   | 22.4   | 22.2 | 21.2   | 22.3  | 22.1 |
| 10 min                  | 16.2   | 15.9 | 15.5   | 15.9  | 16.1 |
| 30 min                  | 14.2   | 12.5 | 12.1   | 13.1  | 12.5 |
| 1 h                     | 12.2   | 11.6 | 11.2   | 12.5  | 11.8 |
| 2 h                     | 9.8    | 8.7  | 8.5    | 9.6   | 8.8  |
| 6 h                     | 8.8    | 7.9  | 7.2    | 8.8   | 8.0  |
| 12 h                    | 7.6    | 6.2  | 5.6    | 6.8   | 6.3  |
| 24 h                    | 7.1    | 5.7  | 5.5    | 6.2   | 5.6  |
| 48 h                    | 6.9    | 5.8  | 5.2    | 6.3   | 5.8  |

Table S2. Changes in pH of cell culture media by temperature and CO<sub>2</sub> concentration

| Sr. No. | Without cell                             | Fresh media | 1 h  | 12 h | 24 h | 36 h | 48 h |
|---------|------------------------------------------|-------------|------|------|------|------|------|
| 1       | Warm bath<br>(37 °C)                     | <b>7.52</b> | 7.52 | 7.53 | 7.63 | 7.64 | 7.7  |
| 2       | 5 % CO <sub>2</sub> incubator<br>(37 °C) | <b>7.52</b> | 7.52 | 7.5  | 7.42 | 7.4  | 7.4  |
| 3       | Peltier refrigerator<br>(6 °C)           | <b>7.52</b> | 7.52 | 7.51 | 7.52 | 7.52 | 7.51 |
| 4       | Room temperature<br>(25 °C)              | <b>7.52</b> | 7.52 | 7.53 | 7.56 | 7.6  | 7.66 |

(a)

Perfusion

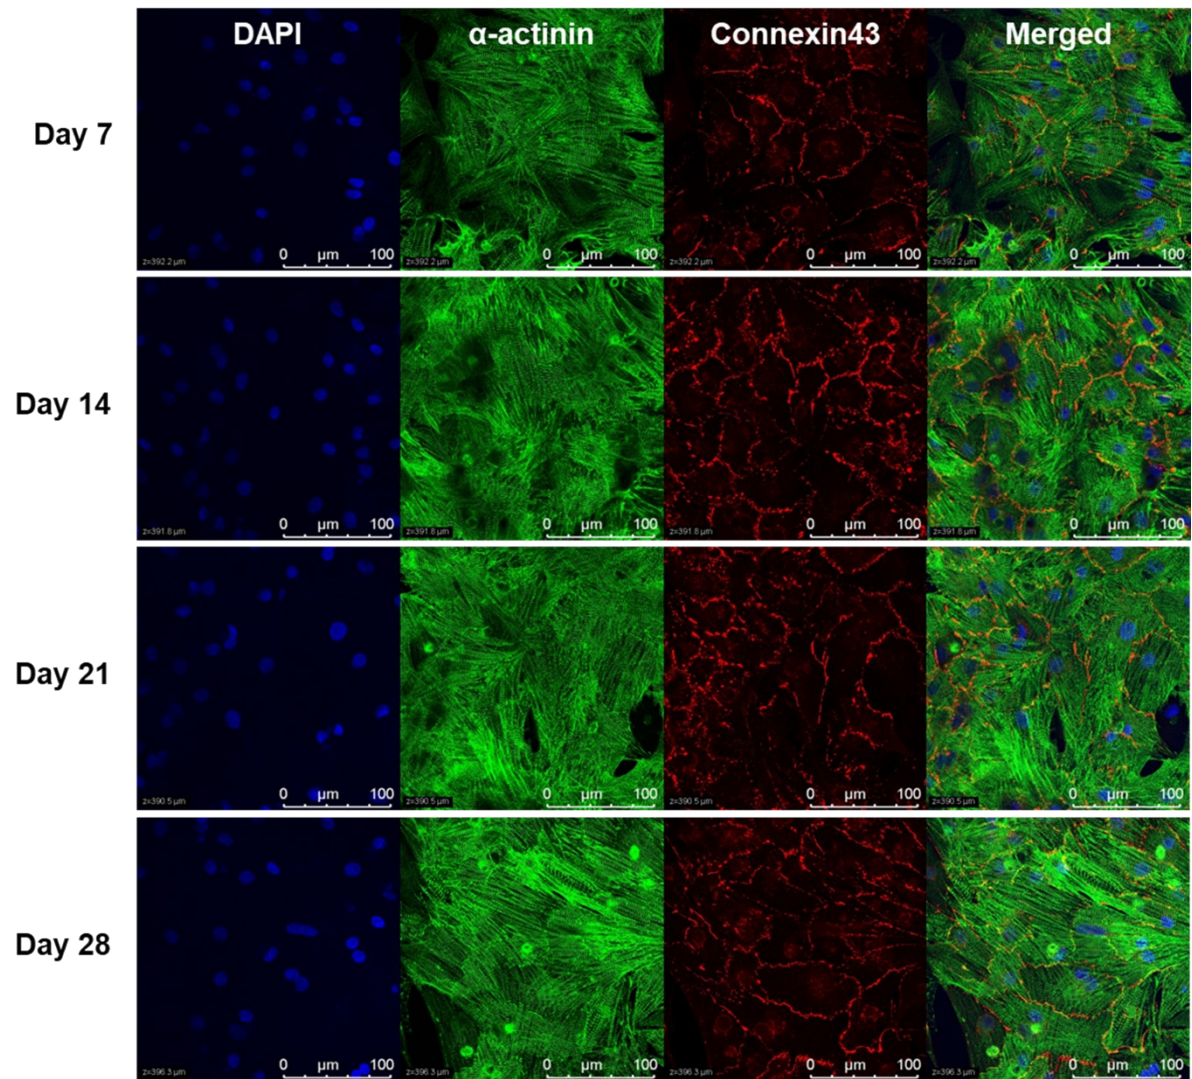



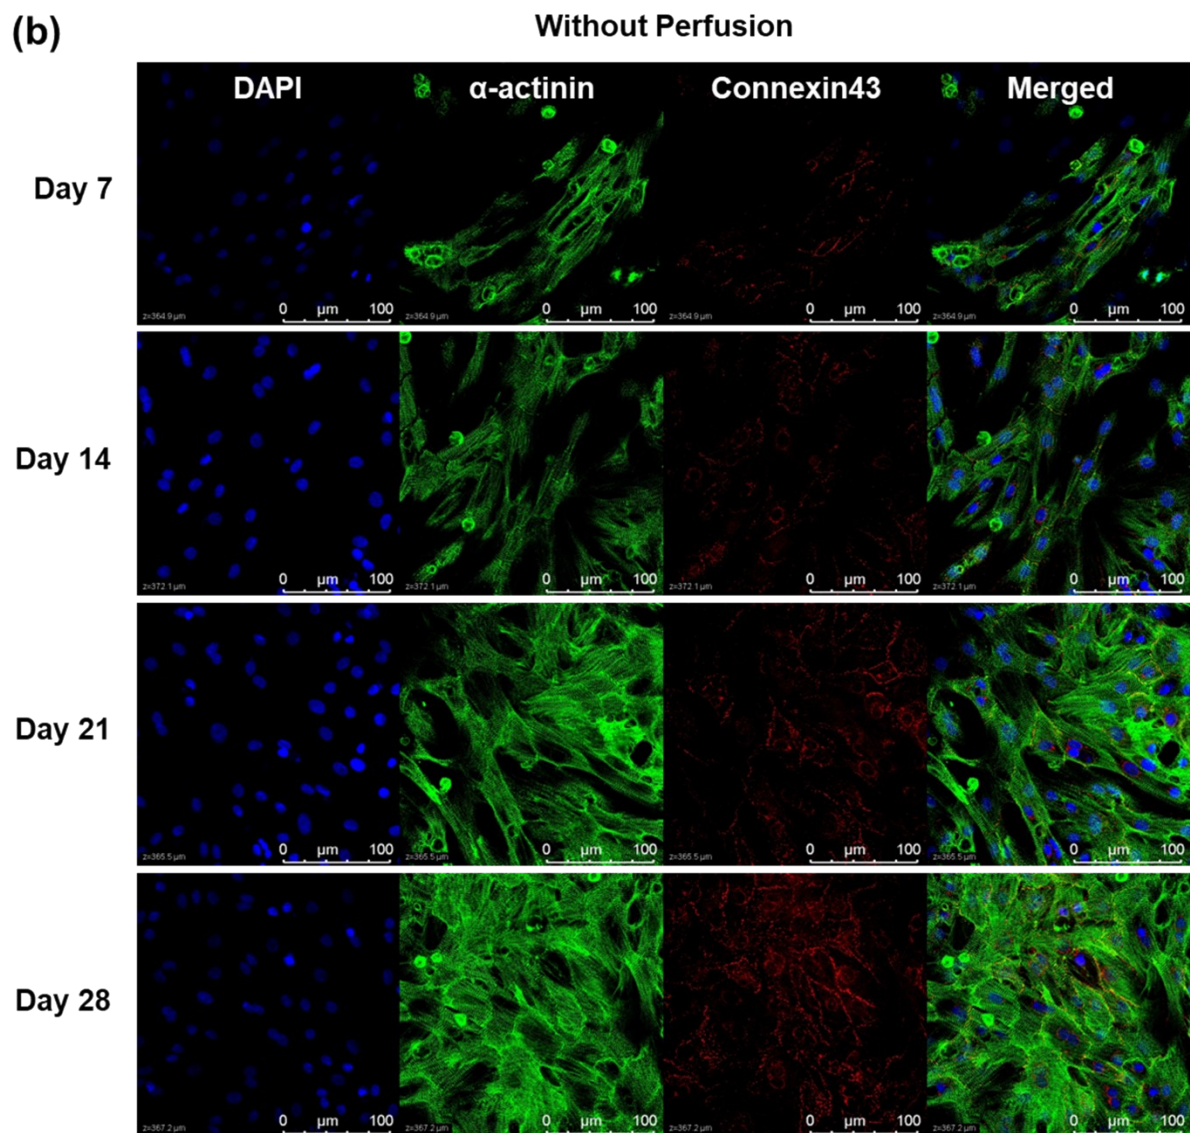

Figure S3. Fluorescent staining images of days 7, 14, 21, and 28 after cardiomyocytes culture; DAPI (blue),  $\alpha$ -actinin (green), Cx43 (red) and merged; (a) Perfusion, (b) without perfusion

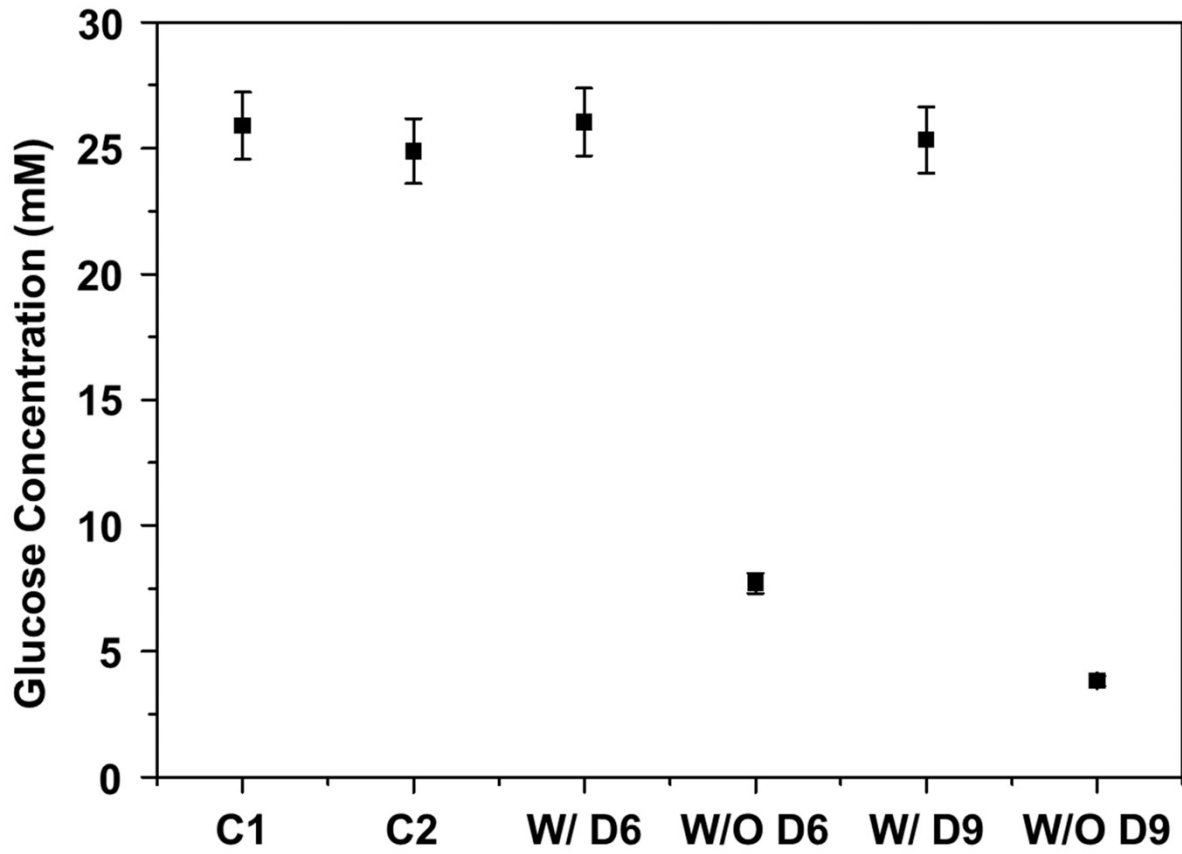

Figure S4. Changes in glucose concentration of cell culture medium according to perfusion



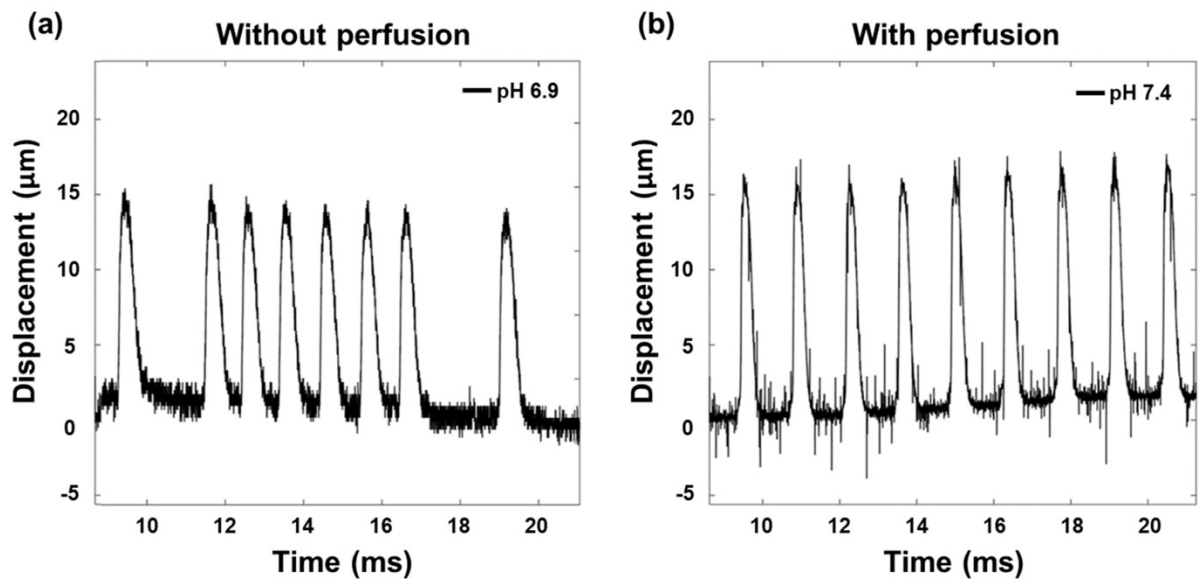

Figure S5. Irregular heartbeat at pH 7.0 or below; (a) without perfusion, (b) with perfusion.

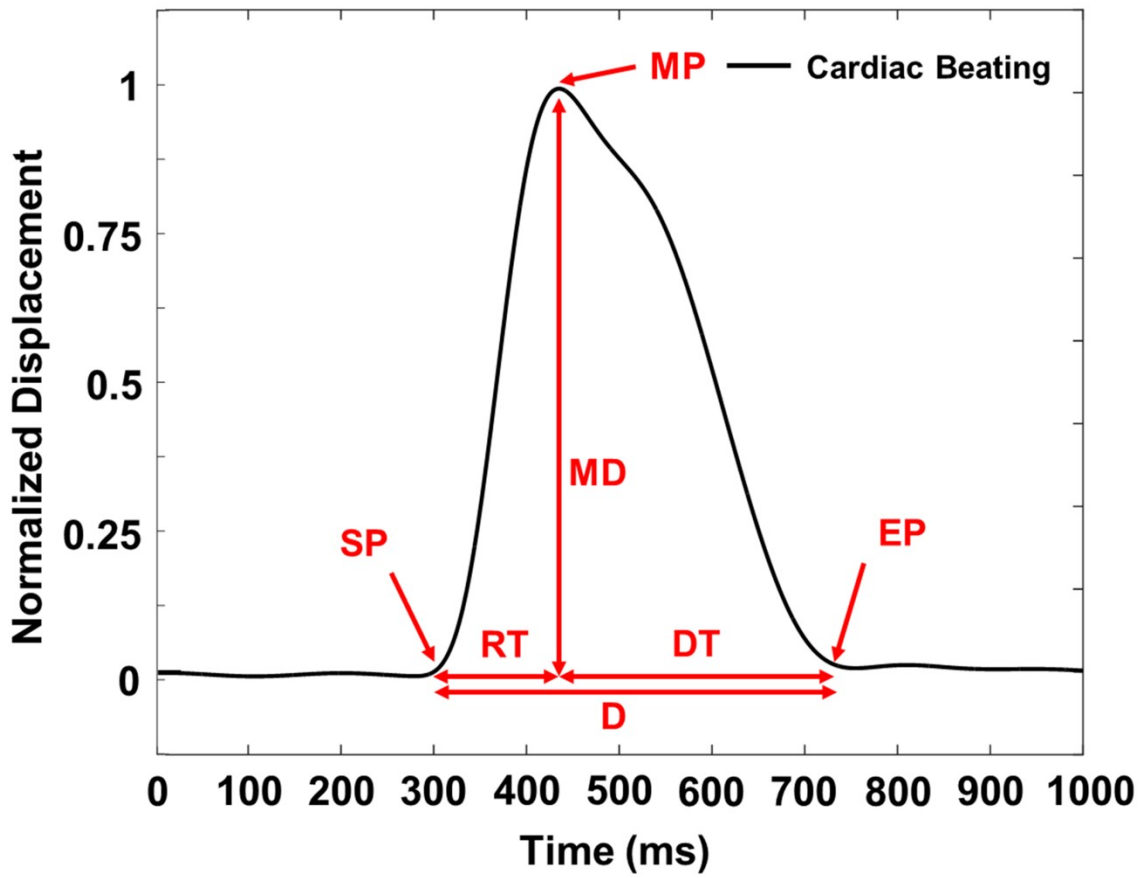

Figure S6. Beating characteristics of cardiomyocytes; Maximum Displacement (MD), Duration (D), Start Point (SP), End Point (EP), Maximum Point (MP), Rise Time (RT), Decay Time (DT)

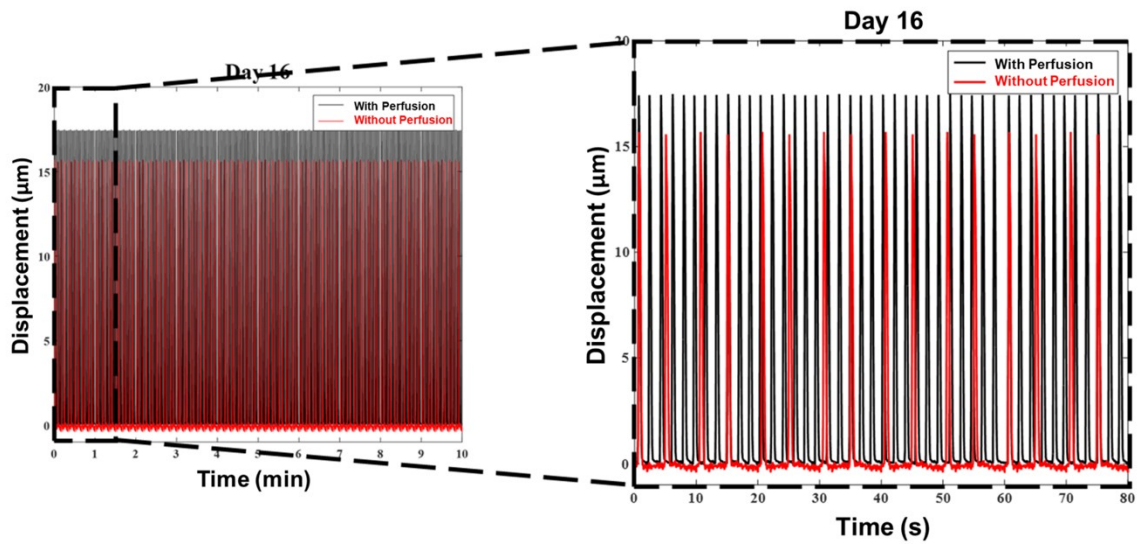

Figure S7. Contraction characteristic on day 16<sup>th</sup> according to with and without culture media perfusion.

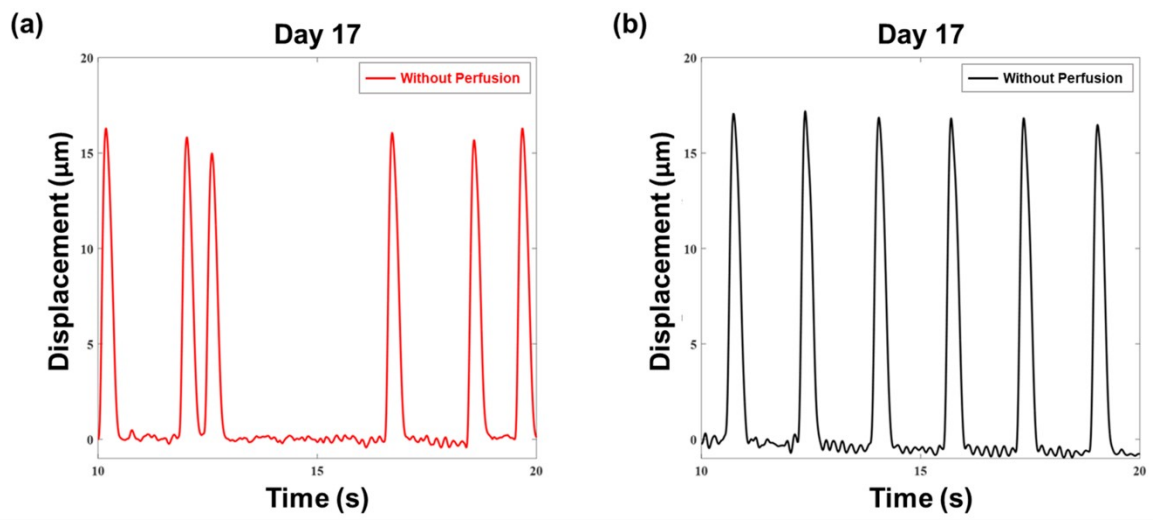

Figure S8. Contraction characteristic on day 17<sup>th</sup> according to with and without culture media perfusion.; (a) without perfusion, (b) with perfusion.

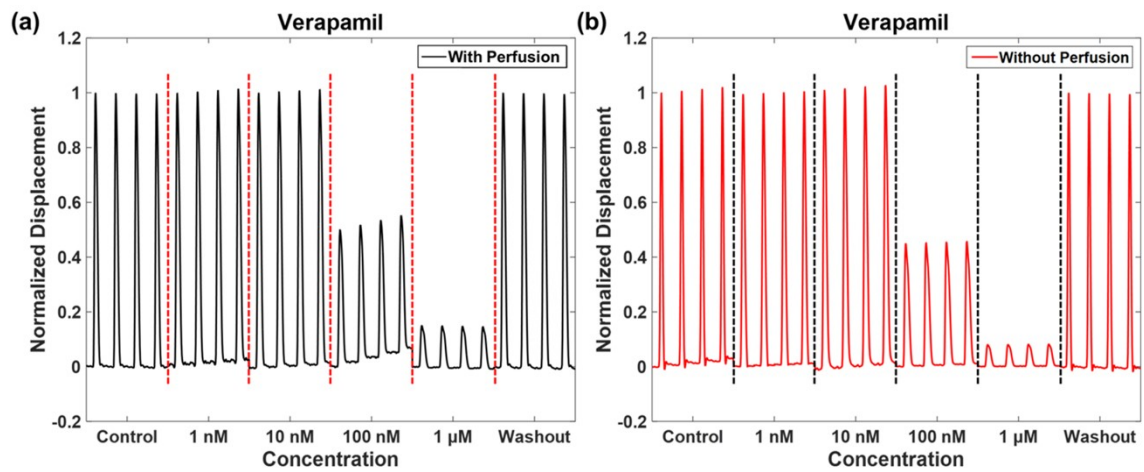

Figure S9. Effect of ion channel-related cardiac drug (verapamil) on the contractility of cardiomyocytes. (a, b) Real-time traces of cardiomyocytes cultured with and without perfusion at different verapamil concentrations.

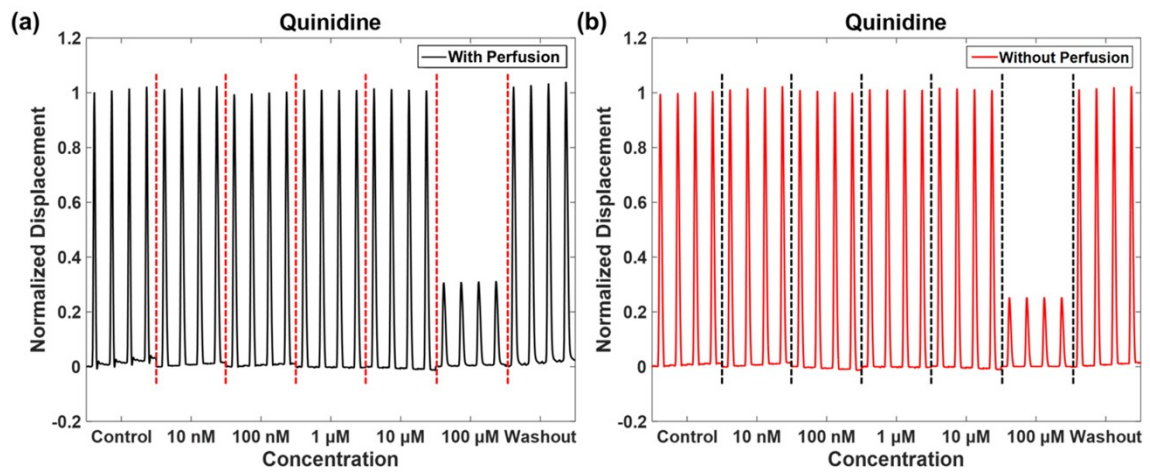

Figure S10. Effect of ion channel-related cardiac drug (quinidine) on the contractility of cardiomyocytes. (a, b) Real-time traces of cardiomyocytes cultured with and without perfusion at different quinidine concentrations.
